# Supplementary material for: Evolving phenotype of systemic lupus erythematosus in Caucasians: low incidence of lupus nephritis, high burden of neuropsychiatric disease and increased rates of late-onset lupus in the ‘Attikon’ cohort
Source: PubMed Central journal article supplement — Lupus. 2020 Feb 27;29(5):514–22. doi: 10.1177/0961203320908932 (PMC7168806; doi:10.1177/0961203320908932), 2020-02-27
Supplement: LUP908932_Supplemental_Material.pdf [file LUP908932_Supplemental_Material.pdf]

Supplementary Table 1. Initial SLE manifestations led to SDI within 6 months after diagnosis.

| Manifestations                                                                                    | Number of events |
|---------------------------------------------------------------------------------------------------|------------------|
| Cerebrovascular events                                                                            | 15               |
| Seizures requiring therapy for 6 months                                                           | 13               |
| Neuropathies (cranial & peripheral)                                                               | 10               |
| Transverse myelitis                                                                               | 4                |
| Psychosis                                                                                         | 3                |
| Pulmonary infarction (radiograph)                                                                 | 10               |
| Venous thrombosis with swelling, ulceration or venous stasis                                      | 19               |
| Pulmonary fibrosis (physical and radiographical)                                                  | 5                |
| Myocarditis [Cardiomyopathy (ventricular dysfunction)]                                            | 3                |
| Arterial thrombosis (tissue loss)                                                                 | 9                |
| Myocardial infarction                                                                             | 1                |
| Chronic kidney disease (Estimated or measured glomerular filtration rate <50%)                    | 5                |
| Pulmonary hypertension (right ventricular prominence, or loud P2 within 6 months after diagnosis) | 2                |
